# Supplementary material for: Application of droplet digital polymerase chain reaction of plasma methylated septin 9 on detection and early monitoring of colorectal cancer
Source: PubMed Central journal article supplement (PMC8648834; doi:10.1038/s41598-021-02879-8), 2021-12-06
Supplement: 41598_2021_2879_MOESM1_ESM.pdf [file 41598_2021_2879_MOESM1_ESM.pdf]

# **Application of Droplet Digital Polymerase Chain Reaction of Plasma Methylated Septin 9 on Detection and Early Monitoring of Colorectal Cancer**

Zhi Yao Ma, PhD<sup>1</sup>; Cherry Sze Yan Chan, MSc<sup>1</sup>; Kam Shing Lau, MMSc<sup>1</sup>; Lui Ng, PhD<sup>2</sup>; Yuen Yee Cheng, PhD<sup>3</sup>; and Wai K. Leung, MD<sup>1</sup>

<sup>1</sup>Department of Medicine, University of Hong Kong, Queen Mary Hospital, Hong Kong

<sup>2</sup>Department of Surgery, University of Hong Kong, Queen Mary Hospital, Hong Kong

<sup>3</sup>Asbestos Diseases Research Institute, Sydney Medical School, The University of Sydney

**Corresponding author:** Wai K. Leung, MD, Department of Medicine, University of Hong Kong, Queen Mary Hospital, Pokfulam Rd, Hong Kong; Phone No.: (852) 22553348; waikleung@hku.hk

>chr17: 77281451-77499029 (forward)

CAGAGAACTTTGTTTGGCTGCCCAAATACAGCCTCCTGCAGAAGGACCCCTGCGCCCGGGGAAGGG  
GAGGAATCTCTCCCTCTGGGCGCCCGCCCTCCTCGCCATGGCCCGGCCTCCACATCCGCCACAT  
CTGGCCGCAGCGGGGCGCCCGGGGGAGGGGCTGAGGCC

Forward Primer: AGAGAACTTTGTTTGGtTGttAAATAtAG

Reverse Primer: AAAAAAATTCCTCCCCTTCC

Methylated Probe: FAM-TGtAGAAGGAttTGCGttCGG

Unmethylated Probe: HEX-tTGtAGAAGGAttTGtGttGG

### **Figure S1. Primers and probes of septin 9.**

The forward and reverse primers were used to bind sequences (gray background) on two sides of human septin 9 methylated sites. The FAM- and HEX-labeled probes (underlined, cover two CpG sites) were designed to separately bind methylated and unmethylated CpG sites (red) in the DNA. Methylated cytosines would remain the same through bisulfite treatment.

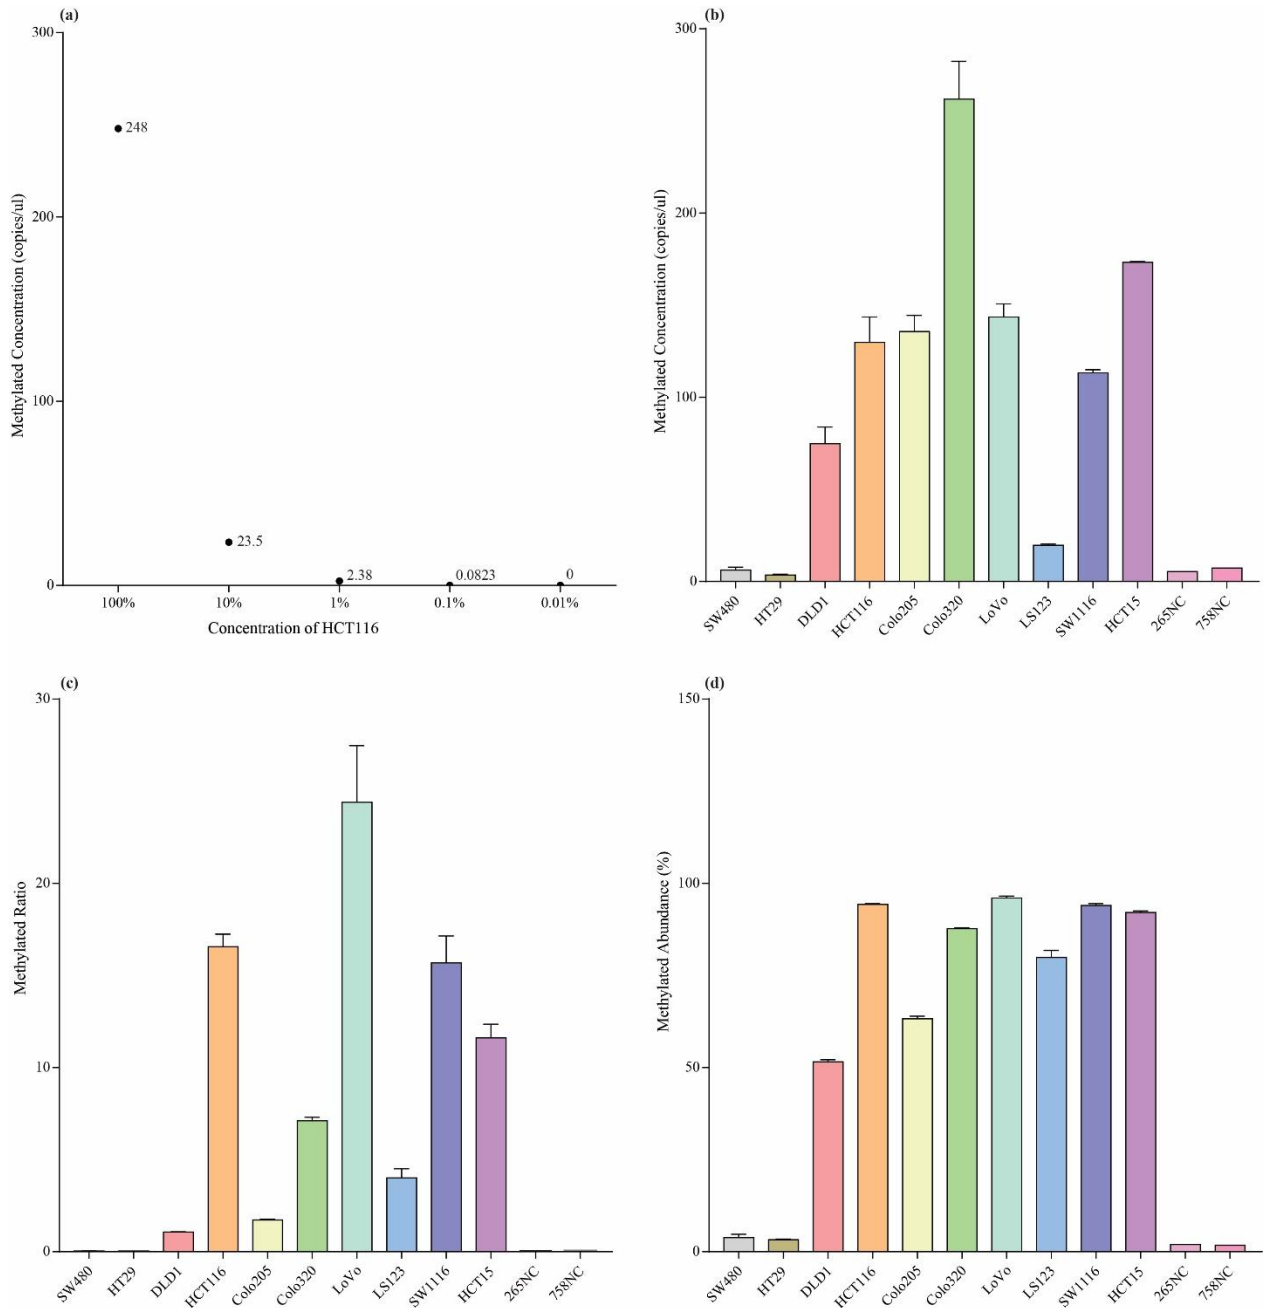

**Figure S2. SEPT9 methylation detection in CRC cell lines and cancer-adjacent tissues.**

(a) represented the dilution test of SEPT9 methylated concentration detected in decreasing concentration of HCT116 (from 100% to 0.01%). (b), (c) and (d) represented SEPT9 methylated concentration, ratio (methylated to unmethylated concentration/copies) and abundance (fraction of methylated concentration/copies in the total) for ten CRC cell lines (SW480, DLD1, HT29, HCT116, Colo205, Colo320, LoVo, LS123, SW1116 and HCT15) in triplicate PCR reaction and two cancer-adjacent normal tissues (265NC and 758NC) in single reaction.
